# Supplementary material for: Tuneable poration: host defense peptides as sequence probes for antimicrobial mechanisms
Source: Springer Nature journal article supplement (doi:10.1038/s41598-018-33289-y), 2018-10-02
Supplement: MOESM2 [file 41598_2018_33289_MOESM2_ESM.pdf]

Movies S1-S4 are available for download (Movies.zip) from the following link:

<http://filexch.npl.co.uk/cgi-bin/download.pl?id=cywqzdvhlzyjthpvqa>
